# Supplementary material for: Hydrothermally Synthesized Ag@MoS2 Composite for Enhanced Photocatalytic Hydrogen Production
Source: MDPI journal article supplement (doi:10.3390/catal13040716), 2023-04-10
Supplement: s1 [file s1]

Supplementary Materials

# Hydrothermally Synthesized Ag@MoS<sub>2</sub> Composite for Enhanced Photocatalytic Hydrogen Production

Anuja A. Yadav <sup>1,†</sup>, Yuvaraj M. Hunge <sup>2,\*</sup>, Ananta G. Dhodamani <sup>3</sup> and Seok-Won Kang <sup>1</sup>

<sup>1</sup> Department of Automotive Engineering, Yeungnam University, 280 Daehak-ro, Gyeongsan 38541, Republic of Korea

<sup>2</sup> Research Institute of Science and Technology (RIST), Tokyo University of Science, 2641 Yamazaki, Noda 278-8510, Chiba, Japan

<sup>3</sup> Department of Chemistry, Sadguru Gadage Maharaj College, Karad 415124, Maharashtra, India

\* Correspondence: yuvarajhunge@gmail.com

† These authors contributed equally to this work.

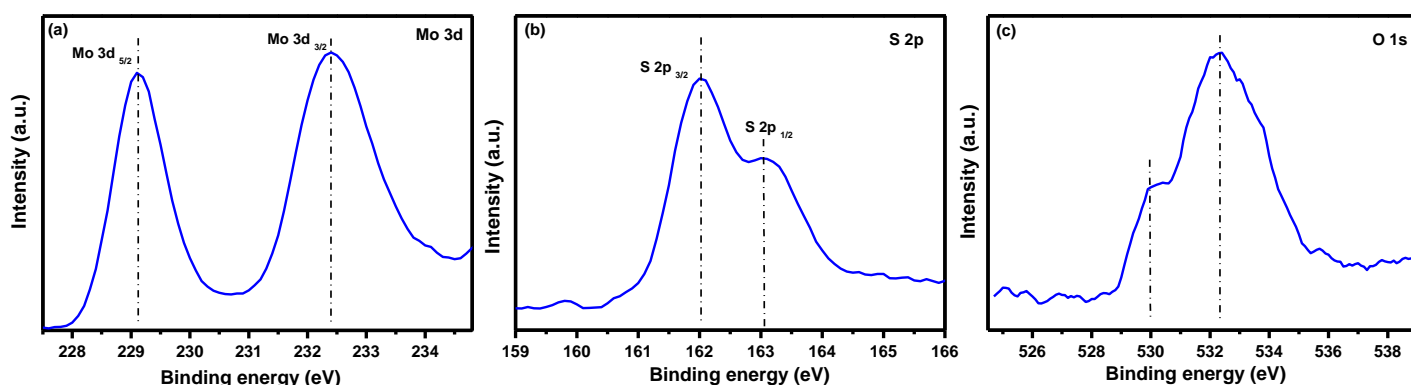

Figure S1. XPS spectrum of MoS<sub>2</sub> a) Mo 3d spectrum, b) S 2p spectrum and c) O 1s spectrum.

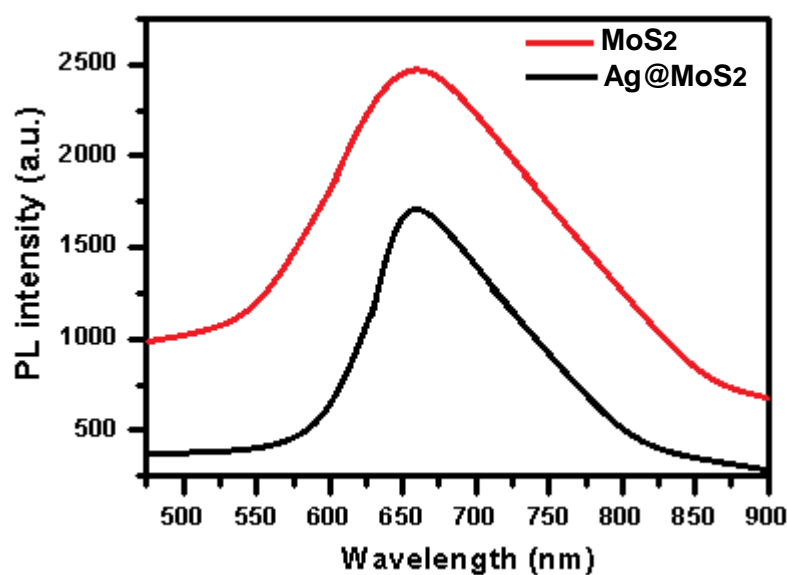

Figure S2. Photoluminescence spectra of MoS<sub>2</sub> and Ag@MoS<sub>2</sub> composite.

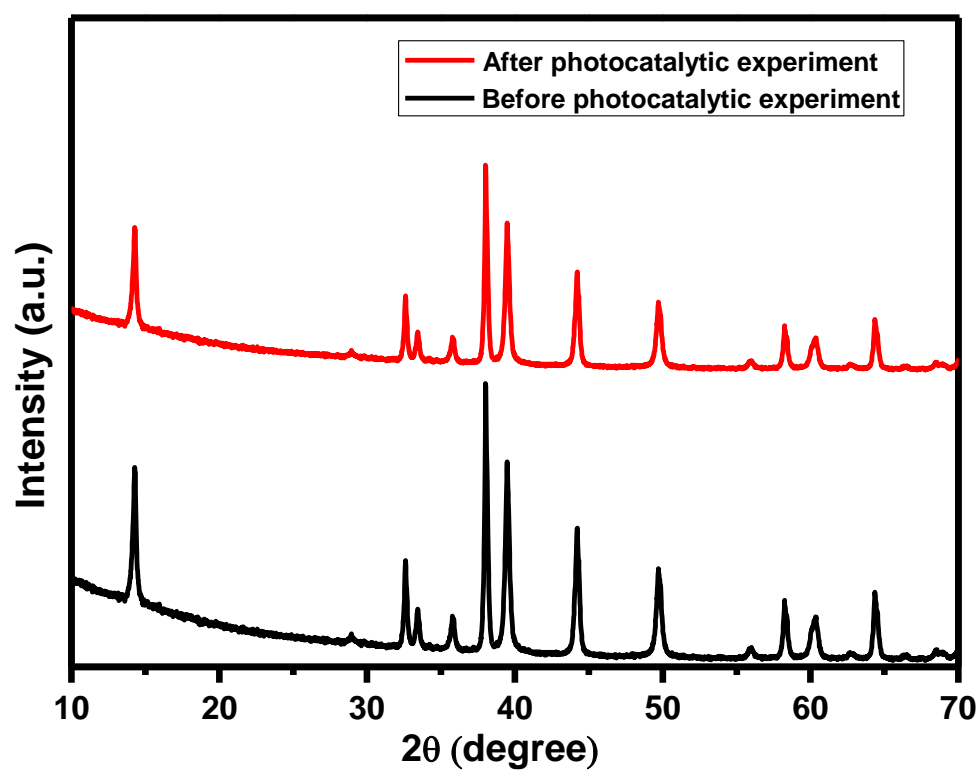

**Figure S3.** XRD patterns Ag@MoS<sub>2</sub> composite before and after (third cycle) the photocatalytic experiment.

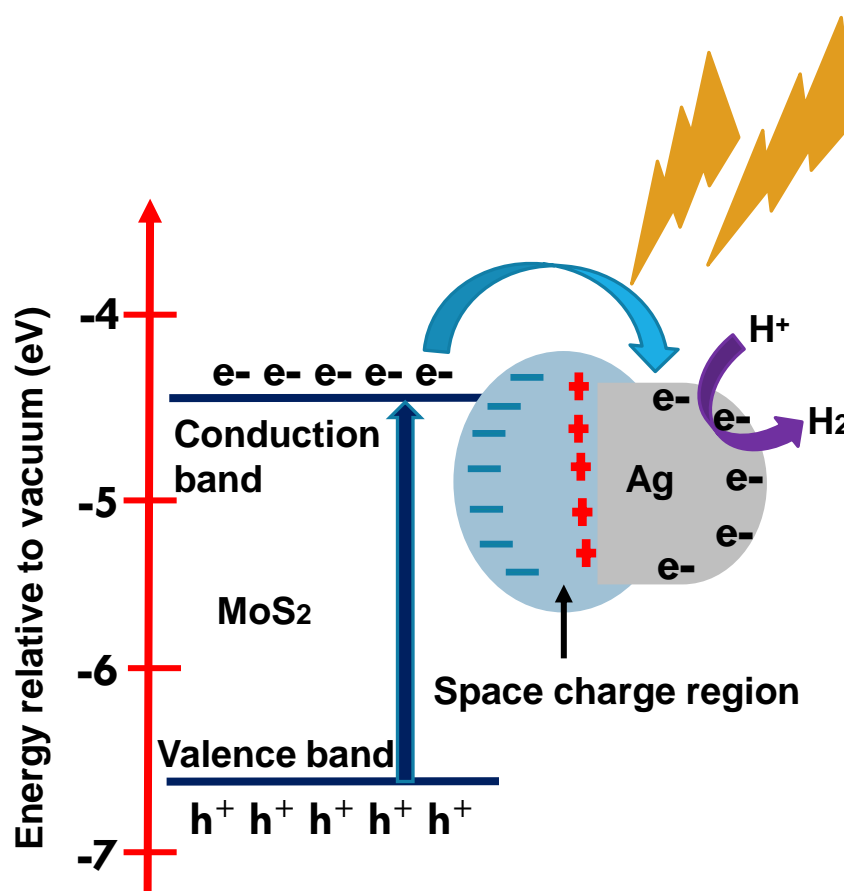

**Figure 4.** Schematic diagram of visible light hydrogen gas evolution over MoS<sub>2</sub> in the presence of Ag NPs as co-catalyst.

**Table S1.** Comparison of photocatalytic hydrogen activity using different photocatalysts.

| Photocatalyst materials                              | Light source            | Hydrogen production rate | Reference           |
|------------------------------------------------------|-------------------------|--------------------------|---------------------|
| Ag/MoS <sub>2</sub> nanocomposite                    | 300 W Xe arc lamp       | 179.5 μmol (5 hr.)       | [7]                 |
| g-C <sub>3</sub> N <sub>4</sub> /Ag/MoS <sub>2</sub> | 300 W of xenon arc lamp | 10.40 μmol/h             | [44]                |
| Ag/MoS <sub>2</sub>                                  | 300 W of xenon arc lamp | 1.185 μmol/h             | [44]                |
| Ni–Ag–MoS <sub>2</sub> ternary nanocatalyst          | Visible/sun light       | 73 μmol/h                | [45]                |
| Carbon nitride (SSCN) @ MoS <sub>2</sub>             | MAX-302 xenon lamp      | 0.91 μmol/h              | [46]                |
| Ag@MoS <sub>2</sub> composite                        | 300 W Xe arc lamp       | 181.3 μmol (4 hr.)       | <b>Present work</b> |
